# Supplementary material for: Erratum to “Epidemiology of Plasmodium and Helminth Coinfection and Possible Reasons for Heterogeneity”
Source: Hindawi journal article supplement (doi:10.1155/2017/9281598), 2017-02-20
Supplement: f1 [file 9281598.f1.docx]

Table 1: Characteristics of some of the studies included in this review

| Study area  (Reference) | Age group | Sample size | Study design | Helminth  Species | *Plasmodium* Species | Findings |
| --- | --- | --- | --- | --- | --- | --- |
| Comoros  Island [31] | Children | 869 | CS | *Al* | NA | Decreased occurrence of malaria in children heavily infected with ‘*Al*’ compared to those with low ‘*Al*’ burden |
| Comoros  Island [26] | Children | 122 | RCT | *Al* | *Pf* | Increased ‘*Pf*’ incidence and *Plasmodium* density in children treated (51%) than untreated with anthelminthic drugs |
| Senegal [54] | Children | 80 | PC | Pooled STHs | *Pf* | Increased malaria incidence in children infected than those uninfected with STHs (RR= 1.54; p=0.003) |
| Senegal [37] | Children | 210 | CC | *Al* | NA | Increased severe malaria attack in children infected with ‘*Al*’than those uninfected with ‘*Al*’ (*A*OR= 9.95; 95% CI= 3.03 32.7) |
| Senegal [19] | Children | 512 | PC | *Sm* | *Pf* | Increased ‘*Pf*’ incidence in children infected with ‘*Sm*’ (particularly in those with heavy egg load) compared to those uninfected (RR= 2.24; p=0.01) |
| Senegal [15] | Children | 523 | PC | *Sh*  Pooled STHs | *Pf* | Decreased *Plasmodium* density in children infected with low intensity ‘*Sh*’ compared to those uninfected with helminths (β= -0.34; 95% CI=−0.85,−0.10)  Lack of association between ‘STH’ infection and *Plasmodium* density |
| Mali [6] | Children | 676 | PC | *Sh* | *Pf* | Decreased number of ‘*Pf*’ episodes (1.55) in children infected than uninfected (1.81 infections ) with ‘*Sh*’ in children with ages from 4 to 8 years |
| Madagascar [27] | Children | 350 | RCT | *Al* | *Pf* | Increased ‘*Pf*’’ incidence and density of the parasite in children treated with anthelminthic drugs compared to those not treated. |
| Madagascar [28] | Children | 212 | RCT | *Al* | *Pf* | Increased ‘*Pf’* incidence and density of the parasite (β=0.25; 95% CI=0.07–0.42) in children treated than those not treated with anthelminthic drugs |
| Uganda [42] | Children and adult | 435 | PC | *Al,* Hw, *Tt* | NA | ‘*Al*’, ‘Hw,’ ‘*Tt*’ infections were not associated with the risk of malaria |
| Uganda [45] | Pregnant women | 2507 | CS | Hw, *Sm*, *Tt* | *Pf* | Increased ‘*Pf*’ prevalence in women infected with ‘Hw’ (OR=1.53; 95% CI=1.09, 2.14). However, ‘Sm’ and ‘Tt’ infections were not associated with the occurrence of ‘Pf’ infection. |
| Kenya [62] | Children | 387 | PC | Pooled STHs  *Sh* | *Pf* | STH and ‘*Sh*’ infection were not associated with the risk of ‘*Pf*’ infection |
| Kenya [39] | Pregnant women | 390 | CS | *Al*, Hw, *Tt* | 95.9% *Pf*,  4.1% mixed *Pf*  and *Pv* | ‘*Al*’, ‘Hw’ and ‘*Tt*’ were not associated with the prevalence of *Plasmodium* infection |
| Ethiopia [32] | Children and adult | 458 | CS | *Al*, Hw, *Tt*  Pooled STHs | *Pf*  *Pv* | Intensity of ‘*Al*’infection was negatively associated with *Plasmodium* density  Intensity of ‘Hw’ infection was positively associated with *Plasmodium* density  ‘*Tt*’ infection didn’t show association with malaria  Prevalence of severe malaria was lower among individuals infected than uninfected with STH (OR=0.317, 95% CI=0.315, 0.86) |
| Ethiopia [17] | Children and adult | 702 | CS | *Al*, Hw, *Tt*  *Sm*  Pooled STH | *Pf*  *Pv* | Increased prevalence of ‘*Pf*’ in individuals infected with ‘*Al*’ compared to those not infected with helminth (AOR= 2.55; 95% CI= 1.40, 4.63)  Increased prevalence of ‘*Pf*’ in individuals infected with ‘*Tt’*  compared to those not infected with helminth (AOR=2.77: 95% CI=1.15, 6.65)  Increased prevalence of ‘*Pf*’ in individuals infected with ‘*Sm*’ compared to those not infected with helminth(AOR=3.25; 95% CI= 1.32, 7.97)  Increased prevalence of ‘*Pf’* in individuals infected with any intestinal helminth species ( AOR=2.89; 95% CI=1.77, 4.72)  Prevalence of ‘*Pf*’ didn’t associate with the occurrence of ‘Hw’ infection |
| Zimbabwe  [13] | Children | 1303 | CS | Hw, *Sm*, *Sh*  *Al*, *Tt* | *Pf* | Increased ‘*Pf*’ prevalence in children infected than uninfected with ‘Hw’ (OR = 2.48; 95% CI= 1.56–3.93)  Increased ‘*Pf*’ prevalence in children infected than uninfected with ‘*Sm*’ (OR = 1.85; 95% CI= 1.20–2.87)  Prevalence of ‘*Pf*’ was similar between children infected than uninfected with ‘*Tt*’ |
| Gahanna [36] | Pregnant women | 746 | CS | Hw, *Al*, *Tt*  Pooled STHs | *Pf* | Increased ‘*Pf*’ prevalence in women infected with ‘Hw’ (AOR=1.6; 95% CI=1.1, 3.6) and ‘*Al*’ (AOR=3.9; 95% CI=1.5, 7.1) than uninfected  ‘*Tt*’ did not associate with the prevalence of ‘*Pf*’ infection  STH infection was associated with the prevalence ‘*Pf*’ infection (AOR=4.8; 95% CI=3.4, 4.0) |
| Brazil [29] | Children | 216 | PC | *Al*, Hw, *Tt* | *Pv* | The risk of the first clinical malaria was similar between those infected and uninfected with STH  Lack of association between ‘*Tt*’ infection and *Plasmodium* density |
| Thailand [34] | Adults | 537 | CC | *Al* | *Pf* | Low cerebral malaria, renal failure and pulmonary edema in patients infected than uninfected with ‘*Al*’ (AOR= 0.25; 95% CI=0.009, 0.67) |
| Thailand [56] | Adults | 177 | CC | Pooled STHs | NA | The odds of malaria related renal failure (AOR= 0.16, 95% CI=0.03, 0.85) and jaundice (AOR=0.39, 95% CI=0.16, 0.96) was less in patients infected than uninfected with helminths |
| Thailand [57] | Adults | 98 | CC | Pooled STHs | NA | Low prevalence of cerebral malaria in patients infected than those uninfected with helminths (AOR= 0.36; 95% CI = 0.19, 0.7) |
| Thailand [35] | Adults | 928 | CS | *Al* | *Pf* and *Pv* | Higher prevalence of mixed ‘*Pf*’ and ‘*Pv*’ infection in patients infected than uninfected with ‘*Al*’ (AOR=3.6; 95% CI=1.2, 11.1) |
| Thailand [53] | Adults | 731 | PC | Pooled STHs | *Pf* and *Pv* | Increased incidence of ‘*Pf*’ malaria in patients infected than uninfected with helminths (ARR=2.24; 95% CI=1.4, 3.6) |
| Thailand [59] | Adults | 307 | CS | Pooled STHs | *Pf* | Increased gametocyte carriage in patents infected than uninfected with STH (AOR=2; 95% CI=1.03–3.8) |
| Thailand [33] | Adults | 119 | CS | *Al* | *Pv* | ‘*Al*’ infection was inversely related with patients’ fever |
| Thailand [30] | Pregnant women | 829 | CS | Hw, *Al* | *Pf* and *Pv* | Increased risk of malaria in women infected with ‘Hw’(AOR=1.66; 95% CI= 1.06, 2.60)  Decrease risk of malaria in women infected with ‘*Al*’ (AOR=0.43; 95% CI=0.23, 0.84) |
| Thailand [49] | Adults | 248 | CS | *Al*, Hw, *Tt* | *Pf* | Increased multiplicity of ‘*Pf’* infection in patients infected than uninfected with ‘*Tt*’ (AOR=2.45; 95 CI=1.14–5.22)  The number of clones of ‘*Pf*’ was similar between patients infected and uninfected with ‘Hw’  The number of clones of ‘*Pf*’ was similar between patients infected and uninfected with ‘*Al*’ |
| Tanzania [51] | Children | 1033 | CS | PooledSTH | *Pf* and *Pv* | ‘STH’ infection was positively associated with the prevalence of *Plasmodium* infection (AOR=1.4, 95% CI =1.0-2.1) |
| Tanzania[48] | children | 1,546 | CS | Hw | *Pf* | Prevalence of ‘*Pf*’ infection was similar between children who were infected and uninfected with ‘Hw’ |
| Ethiopia, Uganda and Kenya [46] | Children | 28050 | CS | Hw, *Sm*, *Sh* | *Pf* and *Pv* | ‘Hw’ infection was associated with an increased prevalence of ‘*Pf*’ infection  There was no association between *Schistosoma* and ‘*Pf*’ infection |
| Colombia  [41] | Children and adult | 246 | CC | *Al*, Hw, *Tt* | *Pf* | ‘Hw’ infection was associated with an increased prevalence of ‘*Pf*’ infection (AOR=4.36; 95% CI= 1.68–11.31)  There was no association between ‘*Al’* and ‘*Pf*’’ infection  There was no association between ‘*Tt’* and ‘*Pf*’ infection |
| Nigeria [58] | Children and adult | 1442 | CC | *Al*, Hw, *Tt* | *Pf* | Helminth infection was associated with a decreased prevalence of malaria  (AOR=0.50; 95% CI= 0.2–0.84 |
| Senegal [25] | Children | 178 | PC | *Sm* | *Pf* | ‘*Pf*’ density was similar between children with moderate or heavy intensity ‘*Sm*’ and those who were not infected with ‘*Sm*’.  ‘*Pf*’ density was lower in children with light intensity ‘*Sm*’ compared to children who were not infected with ‘*Sm*’(β=-0.28; 95% CI=-0.52, -0.04) |
| Nigeria [40] | Children | 690 | RCT | *Al* | *Pf* | Prevalence and density of *‘Pf’* was similar between children infected and uninfected with ‘*Al*’ |
| Côte d'Ivoire  [47] | Children adult | 324 | CS | Hw | *Pf* | Prevalence of ‘*Pf*’ was higher in children of age 6-8 years who were infected  than uninfected with ‘Hw’ (AOR=7.47; 95% CI=1.84, 30.32) |
| Cameroon [61] | Children | 263 | CS | *Al*  *Tt* | *Pf* | Prevalence of ‘*Pf*’ was similar between children infected and not infected with STH |
| Senegal [52] | Children | 203 | PC | *Hw*, *Al*  *Tt* | *Pf* | Increased odds of ‘*Pf*’ infection in children infected than uninfected with STH (AOR=2.69, 95% CI=1.34, 5.39) |
| Gabon [14] | Children | 125 | CS | *Sh* | *Pf* | Prevalence of ‘*Pf*’ was similar between children infected and uninfected with ‘*Sh*’ |
| Senegal [16] | Children | 234 | PC | *Sh* | *Pf* | The risk of ‘*Pf*’ infection and density of the parasite was similar between children infected and uninfected with ‘*Sh*’ |
| Ethiopia [8] | Children | 387 | CS | *Sh* | *Pf* | Prevalence of ‘*Pf*’ infection was higher among children infected than uninfected with ‘*Sh*’ (OR:=2.8; 95% CI= 1.21, 6.5) |
| Mali [9] | Children | 616 | PC | *Sh* | *Pf* | Prevalence of ‘*Pf*’ infection was higher among children infected than uninfected with ‘*Sh*’ (OR=3.23, 95% CI= 1.76, 5.90) |
| Kenya [10] | Children | 223 | CS | *Sh* | *Pf* | Prevalence of ‘*Pf*’ infection was higher among children infected than uninfected with ‘*Sh*’ (OR=1.67,95% CI=1.46, 1.99) |
| Uganda [18] | Children | 5000 | CS | *Sm* | *Pf* | Prevalence of ‘*Pf*’ infection was higher among children infected than uninfected with ‘*Sm*’ (OR: 2.16, 95% CI: 1.89, 2.47). |

Al: *Ascaris lumbricoides*; CC: Case Control; CS: Cross-sectional; Hw: hookworm; NA: not available/not provided/not mentioned/not speciﬁed; OR: odds ratio; Pf: *Plasmodium falciparum*; Pv: *Plasmodium vivax*; RCT: randomized control trial; RR: Relative risk; Sh: *Schistosoma haematobium*; Sm: *Schistosoma manosni*; STH: soil-transmitted helminths; Tt: *Trichuris trichiuria*; PC: Prospective control
